# Supplementary material for: Zinc(ii) complexes with uncommon aminal and hemiaminal ether derivatives: synthesis, structure, phosphatase activity and theoretical rationalization of ligand and complex formation
Source: Royal Society of Chemistry journal article supplement (doi:10.1039/c8nj01853g), 2018-01-01
Supplement: c8nj01853g1.pdf [file c8nj01853g1.pdf]

## Supporting information

### **Zinc(II) Complexes with Uncommon Amino and Hemiaminal Ether Derivative: Synthesis, Structure, Phosphatase Activity and Theoretical Rationalization of Ligand and Complex Formation**

Suranjana Purkait<sup>a</sup>, Prateeti Chakraborty<sup>b</sup>, Antonio Frontera,<sup>c</sup> Antonio Bauzá,<sup>c</sup> Ennio Zangrando<sup>d\*</sup>, and Debasis Das<sup>a\*</sup>

<sup>a</sup>Department of Chemistry, University of Calcutta, 92 A. P. C. Road, Kolkata-700009, India

<sup>b</sup>Department of Chemistry, Bangabasi College, 19, Rajkumar Chakraborty Sarani, Baithakkhana, Kolkata, West Bengal 700009

<sup>d</sup>Departament de Química, Universitat de les Illes Balears, Crta. De Valldemossa km 7.5, 07122 Palma (Balears), Spain

<sup>f</sup>Department of Chemical and Pharmaceutical Sciences, University of Trieste, Via L. Giorgieri 1, 34127 Trieste, Italy

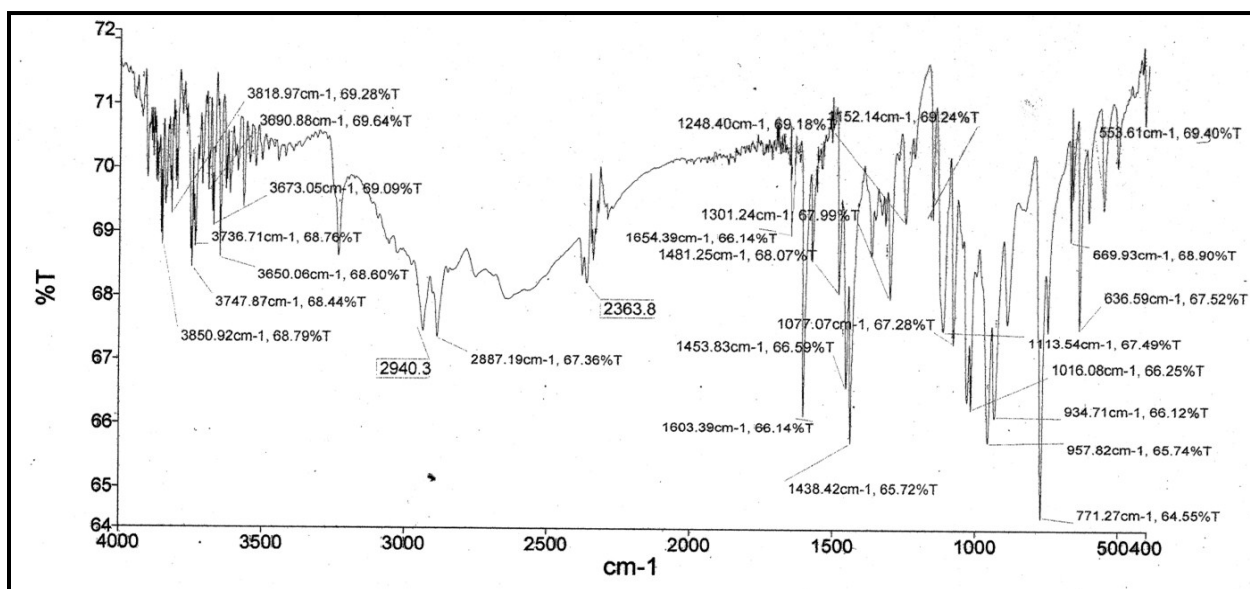

Fig. S1 IR Spectrum of Complex 1.

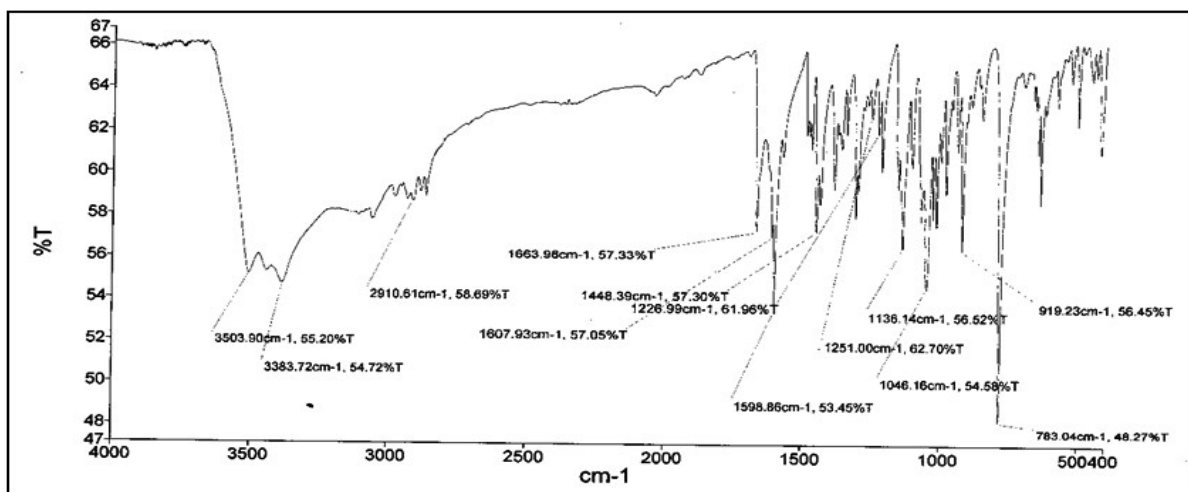

Fig. S2 IR Spectrum of Complex 2.

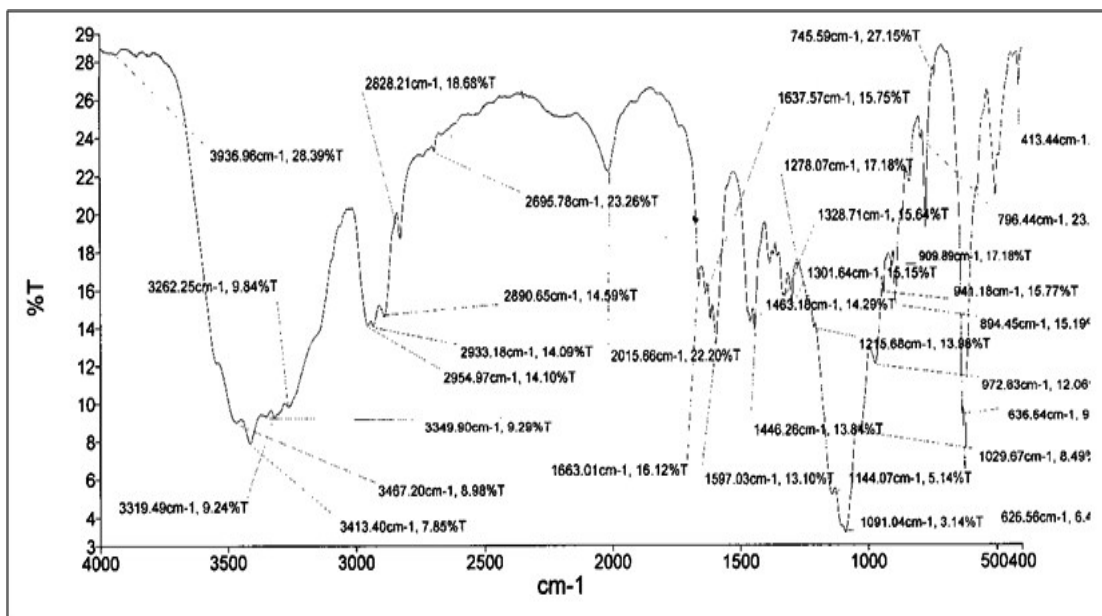

Fig. S3 IR Spectrum of Complex 3.

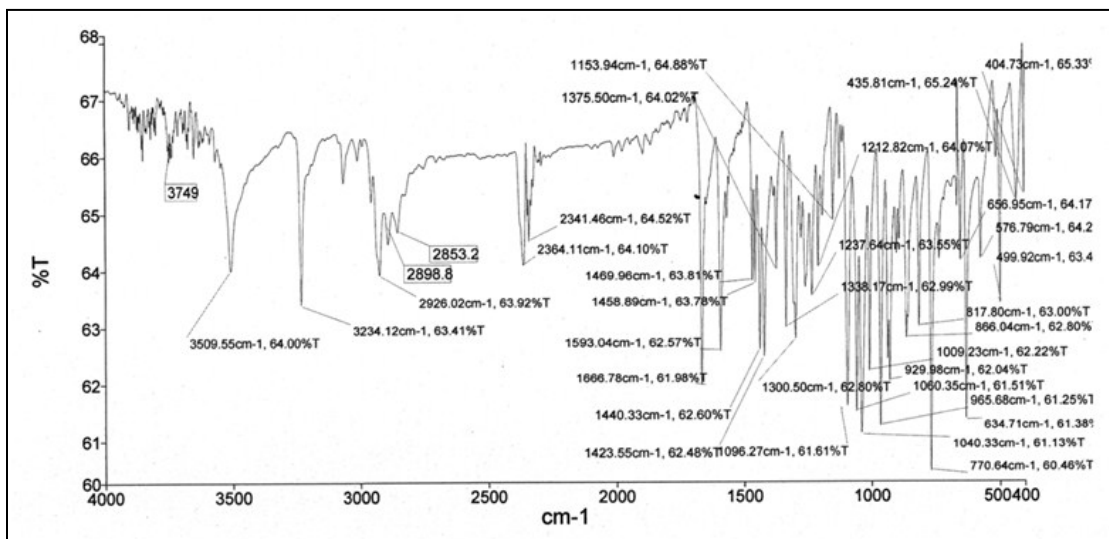

Fig. S4 IR Spectrum of Complex 4.

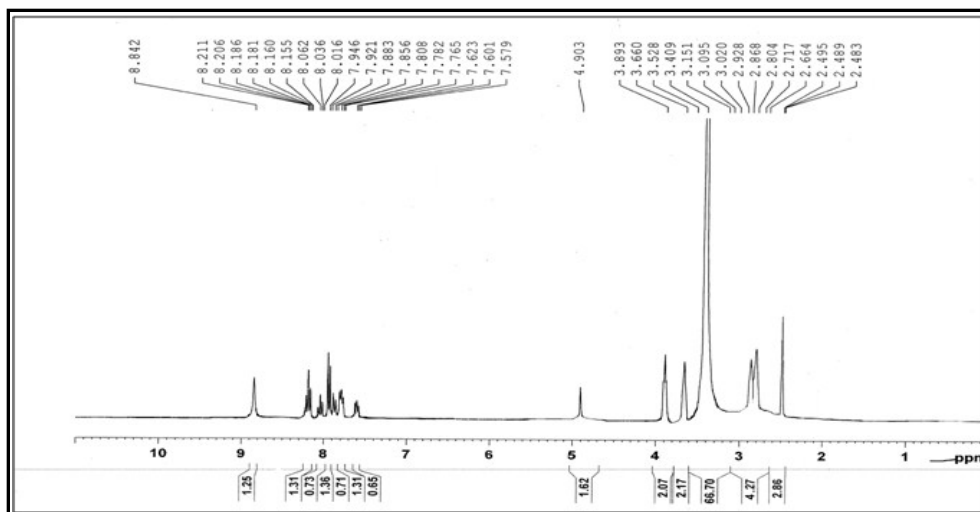

Fig. S5 <sup>1</sup>H NMR Spectrum of ligand L.

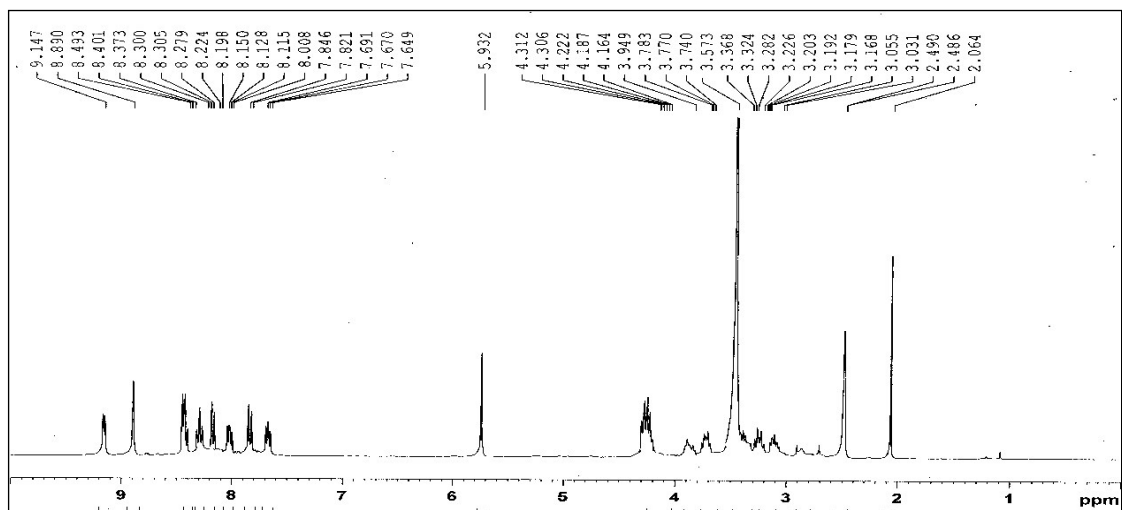

Fig. S6 <sup>1</sup>H NMR Spectrum of Complex 2.

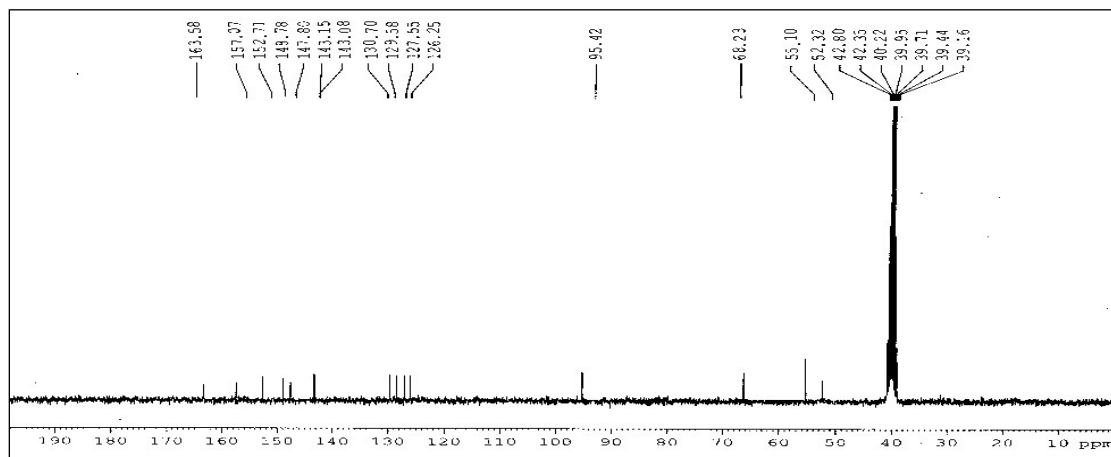

**Fig. S7**  $^{13}\text{C}$  -NMR Spectrum of Complex 2.

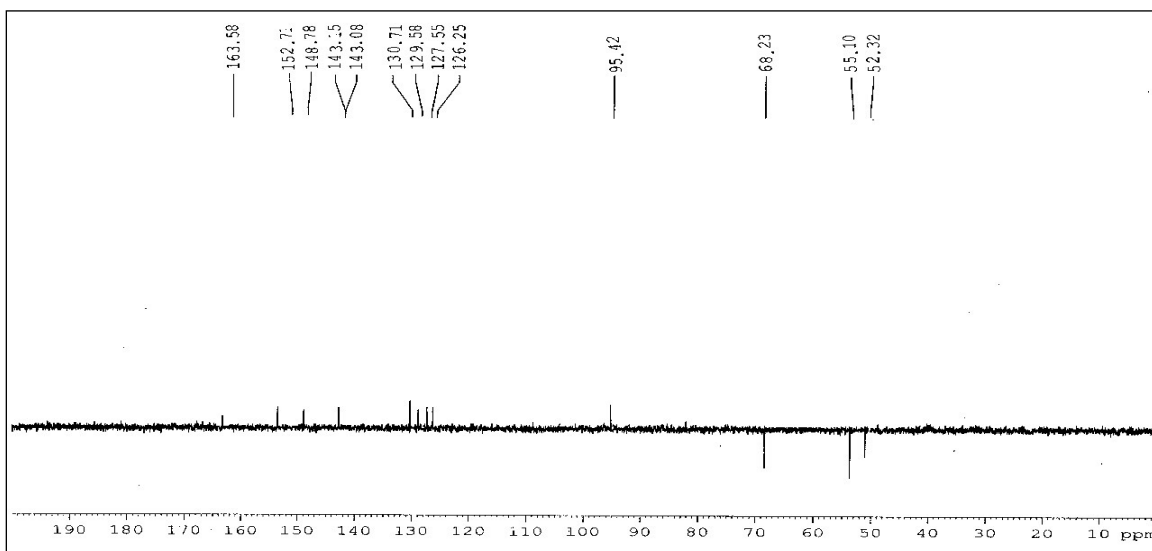

**Fig. S8** DEPT-135 Spectrum of Complex 2.

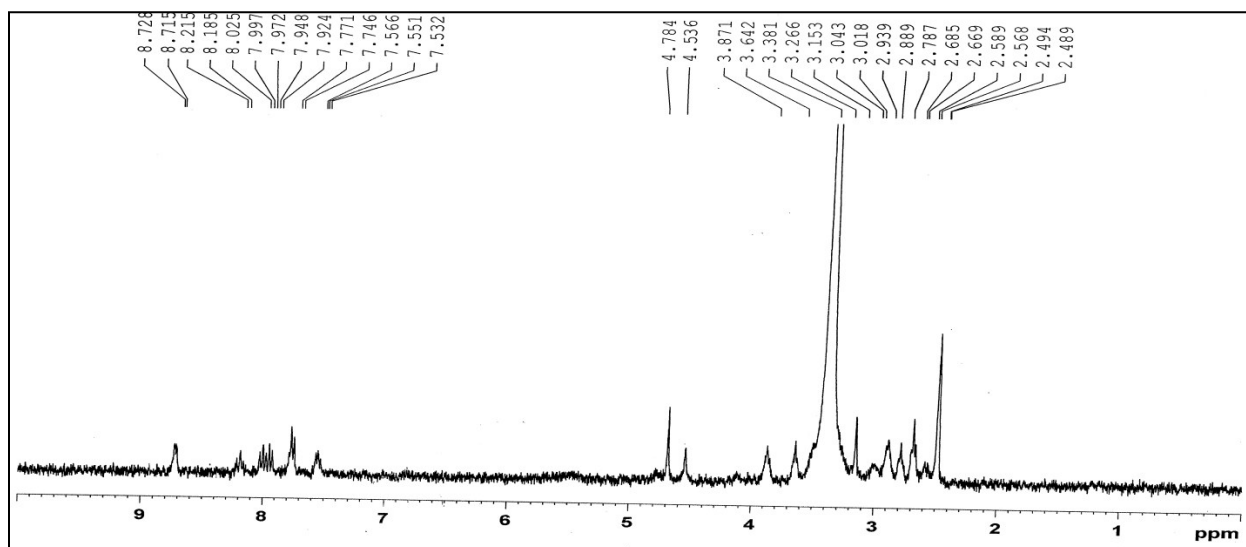

**Fig. S9**  $^1\text{H}$ - NMR Spectrum of Complex 4.

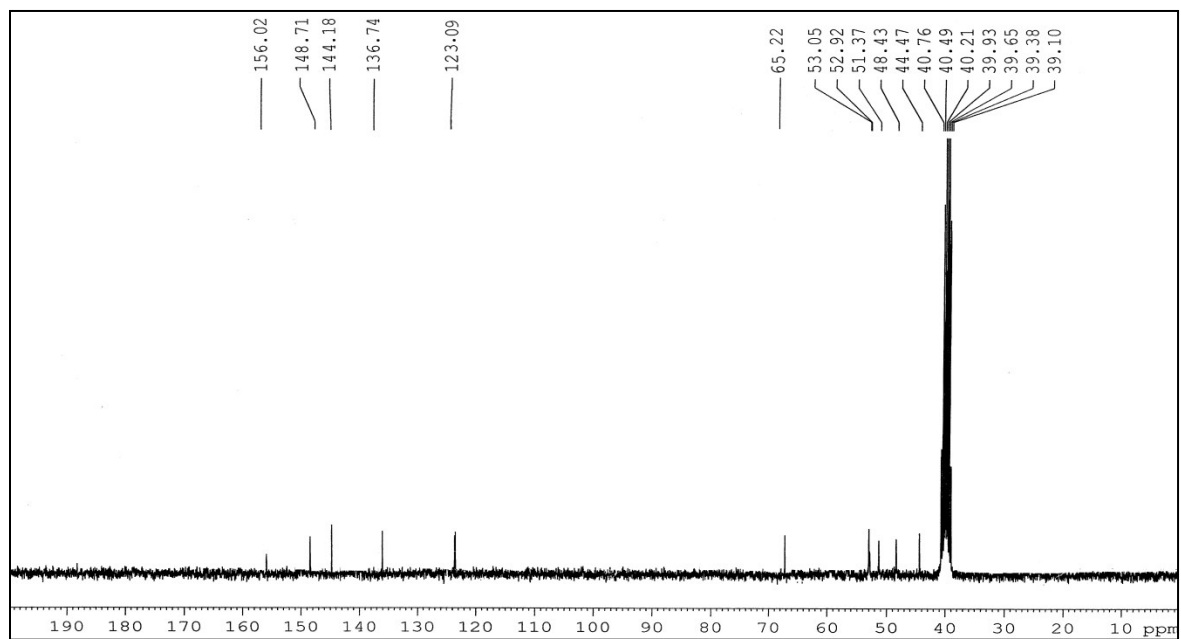

**Fig.S10**  $^{13}\text{C}$ - NMR Spectrum of Complex 4.

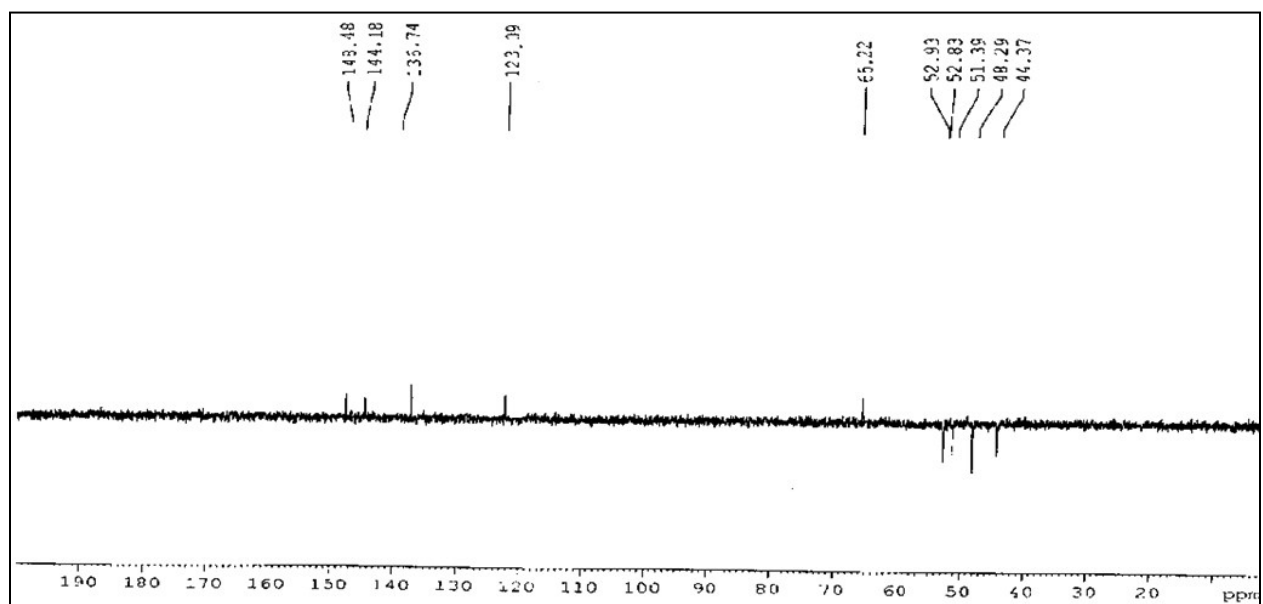

**Fig. S11** DEPT-135 Spectrum of Complex 4.

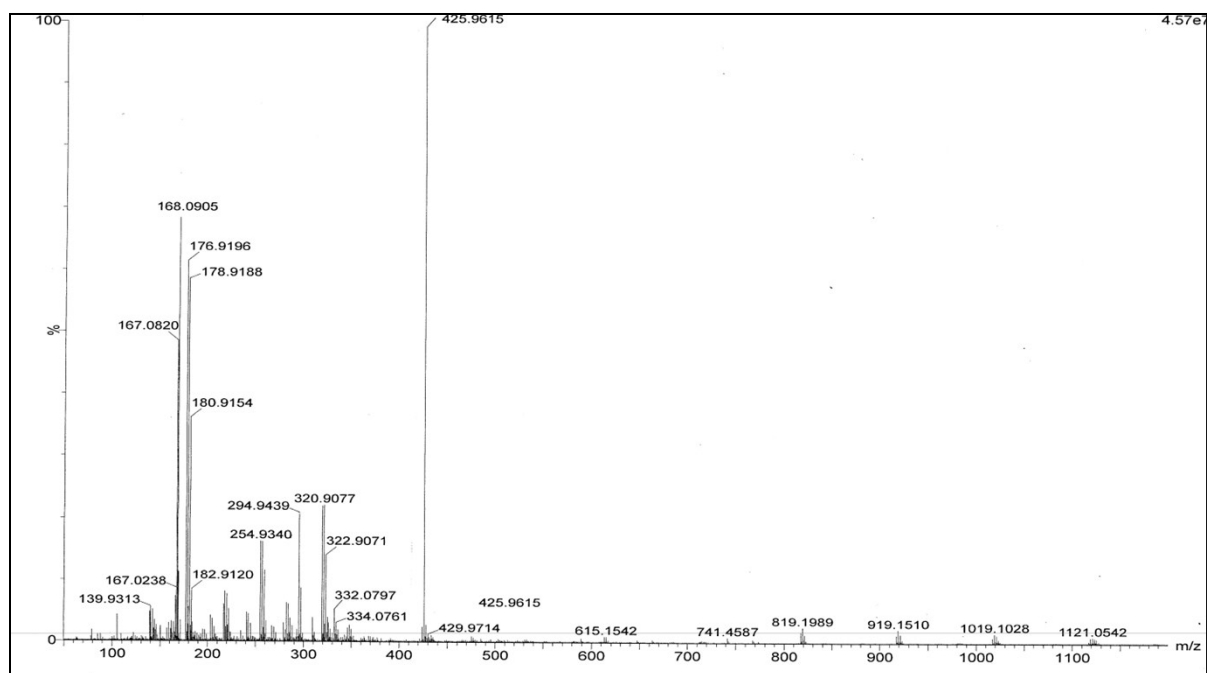

**Fig. S12** Mass Spectrum of Complex 1.

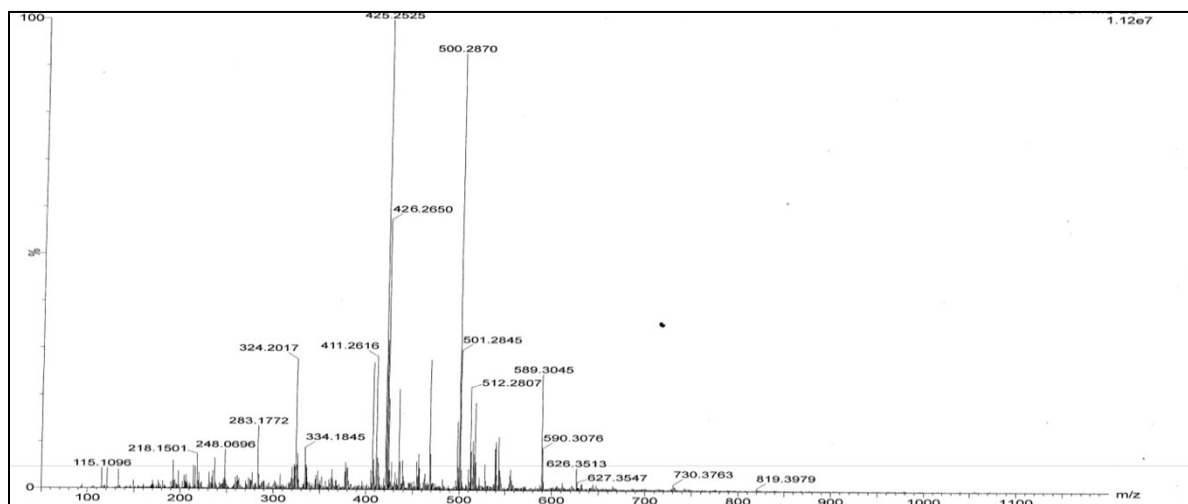

**Fig.S13** Mass Spectrum of Complex 2.

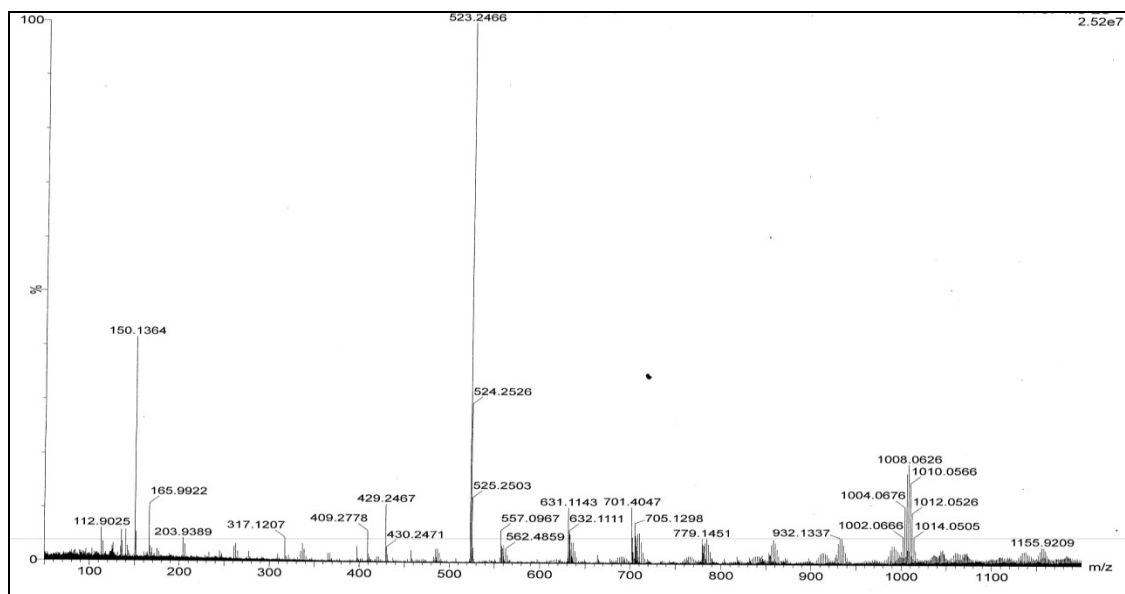

**Fig. S14** Mass Spectrum of Complex 3.

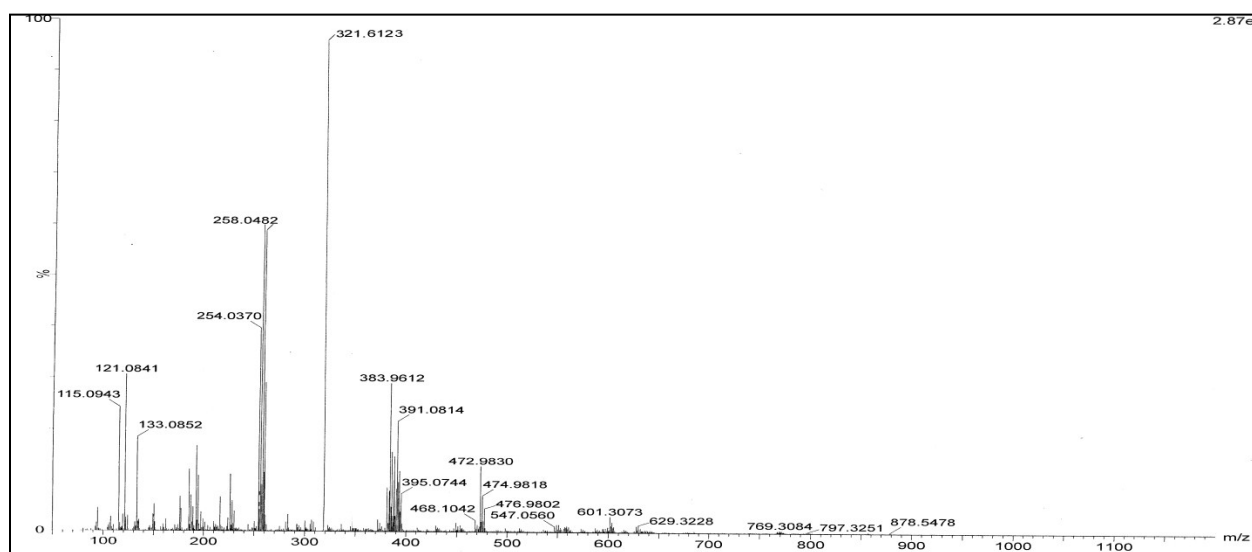

**Fig. S15** Mass Spectra of Complex 4.



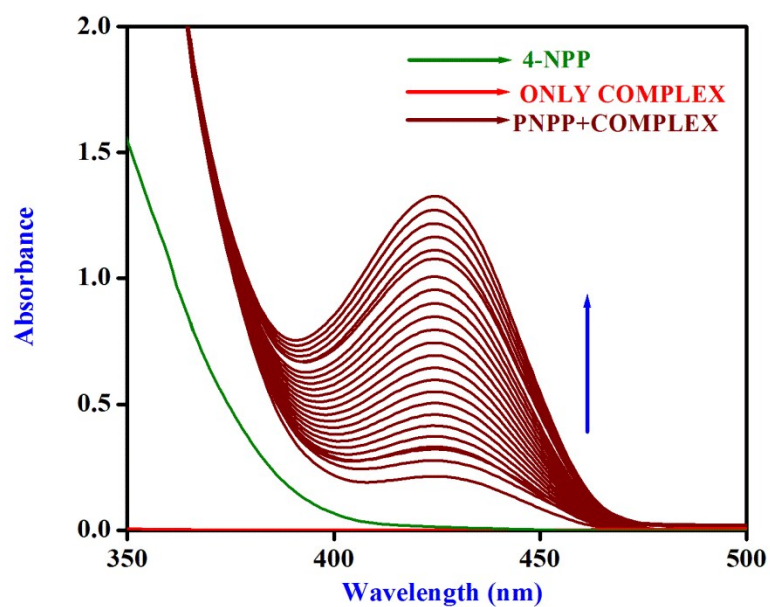

**Fig. S16** Wavelength scan for the hydrolysis of 4-NPP in the absence and presence of complex 2 (substrate: catalyst = 20:1) in 97.5% DMF recorded at 25 °C at an interval of 5 min for 2 h.

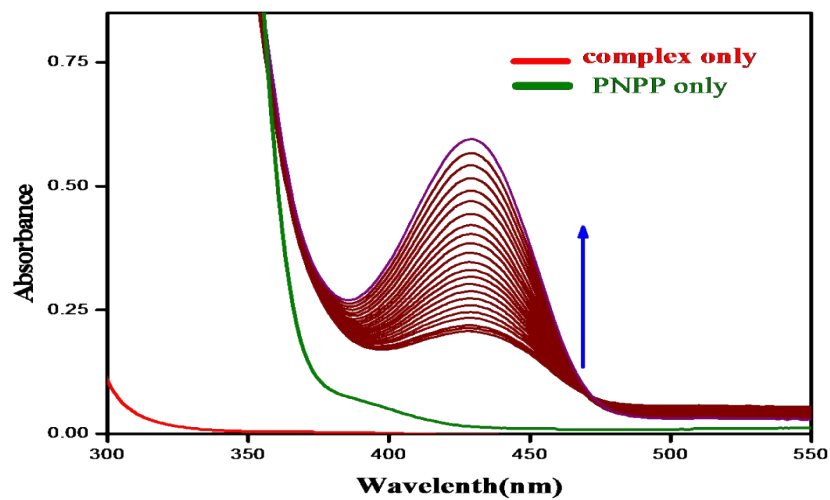

**Fig. S17** Wavelength scan for the hydrolysis of 4-NPP in the absence and presence of complex 3 (substrate: catalyst = 20:1) in 97.5% DMF recorded at 25 °C at an interval of 5 min for 2 h.

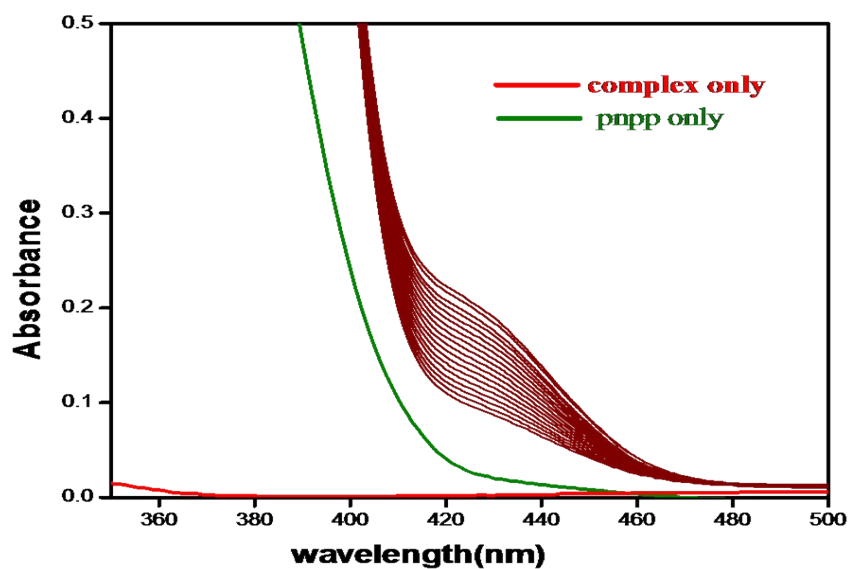

**Fig. S 18** Wavelength scan for the hydrolysis of 4-NPP in the absence and presence of complex 4 (substrate: catalyst = 20:1) in 97.5% DMF recorded at 25 °C at an interval of 5 min for 2 h.

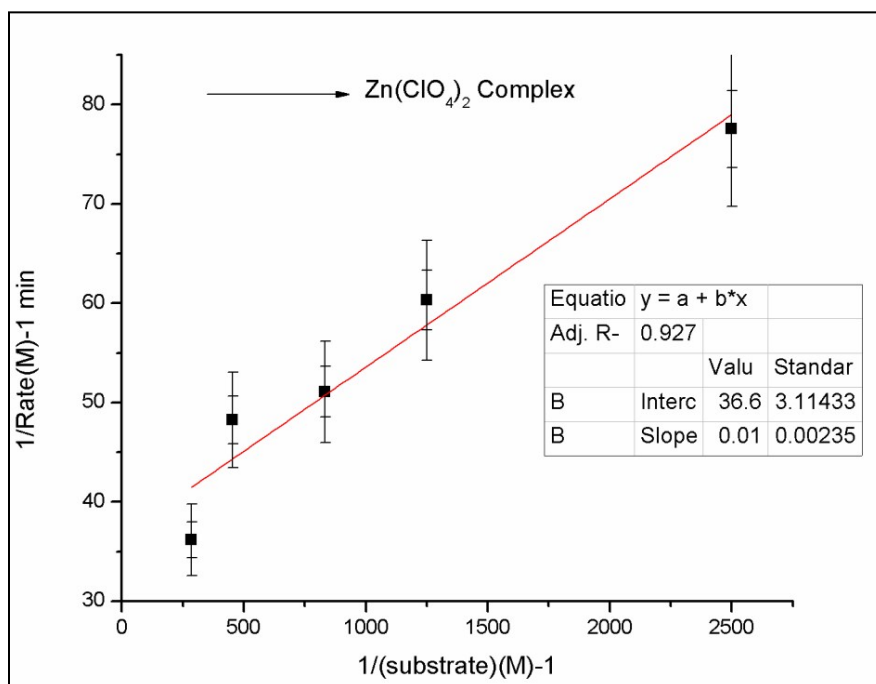

**Fig. S19** Lineweaver–Burk plot of Complex 1.

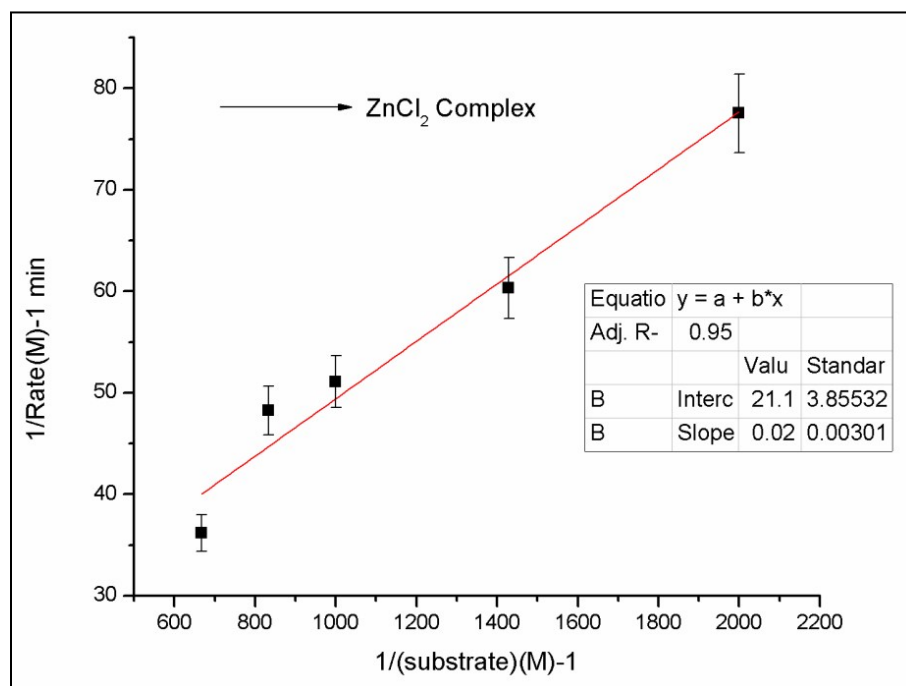

**Fig. S20** Lineweaver-Burk plot of Complex 2.

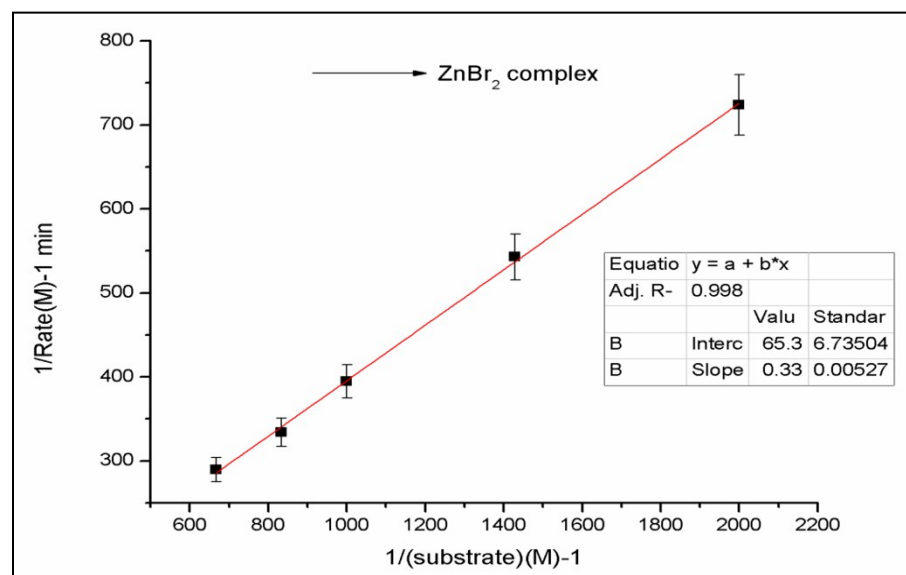

**Fig. S21** Lineweaver-Burk plot of Complex 3.

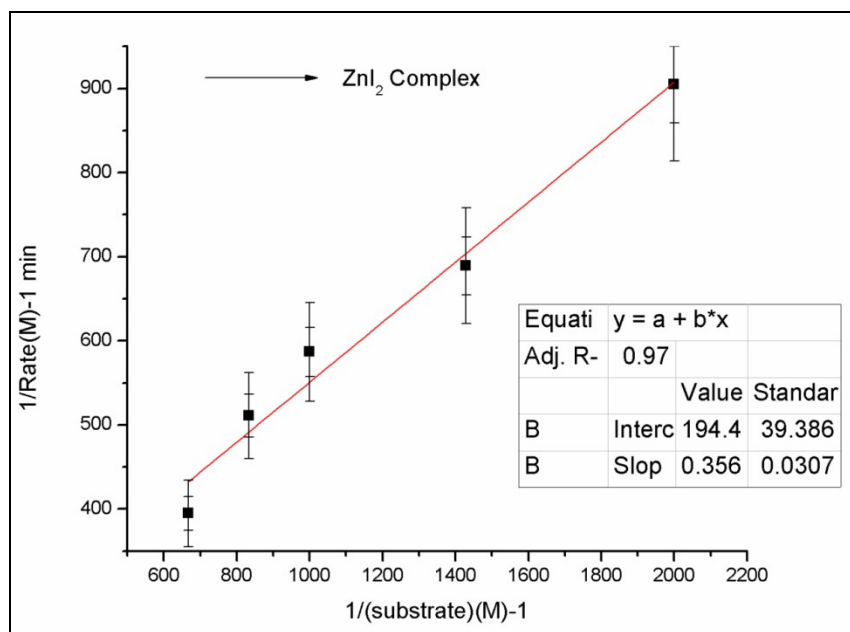

**Fig. S22** Lineweaver–Burk plot Complex 4.

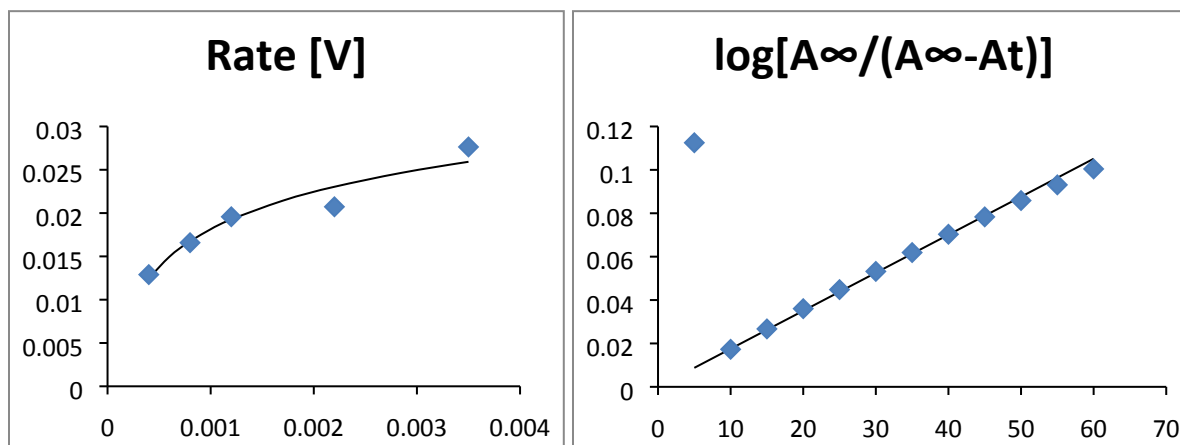

**Fig. S23** Plot of Enzymatic Kinetics for Complex 1.

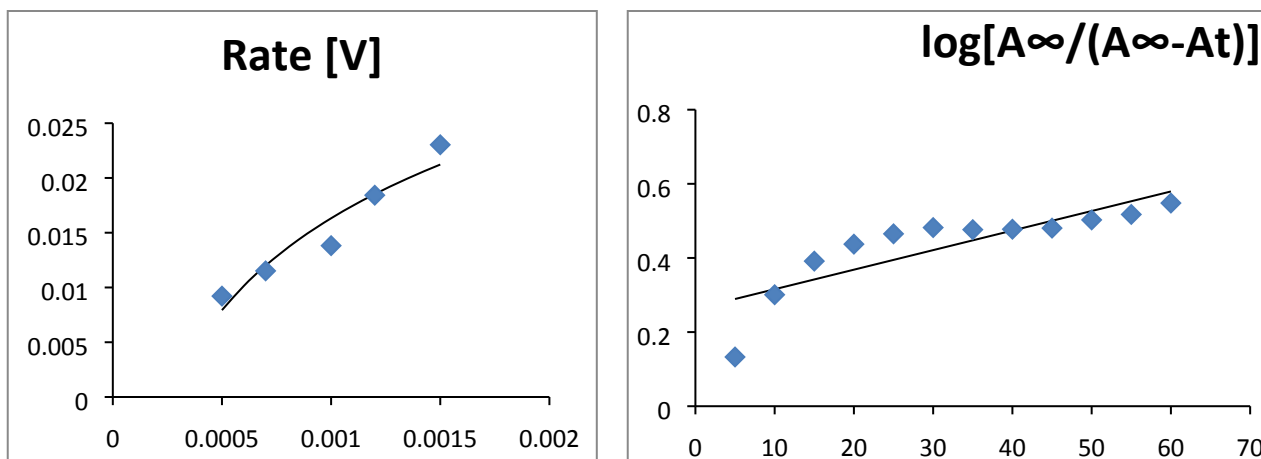

**Fig.S24** Plot of Enzymatic Kinetics for Complex 2

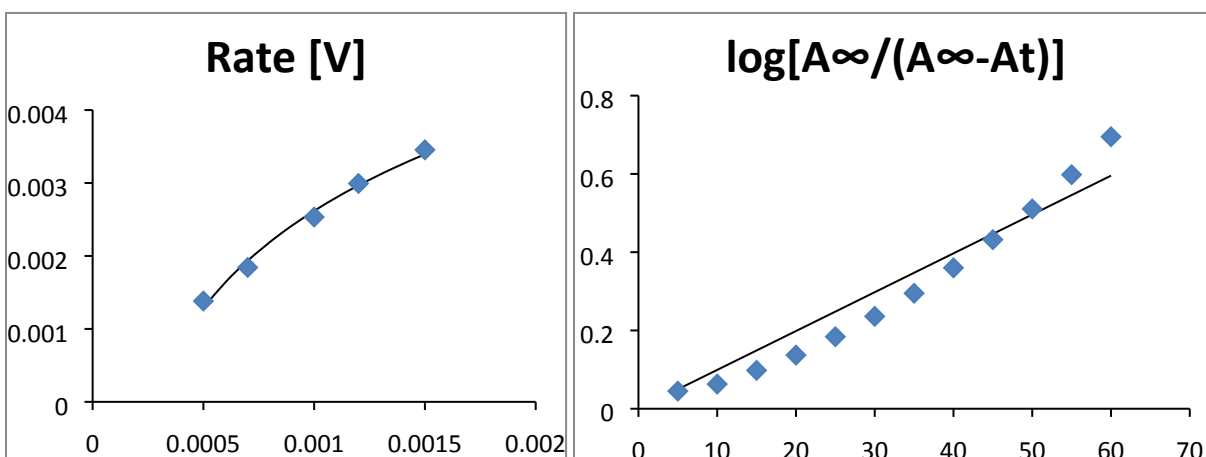

**Fig. S25** Plot of Enzymatic Kinetics for Complex 3

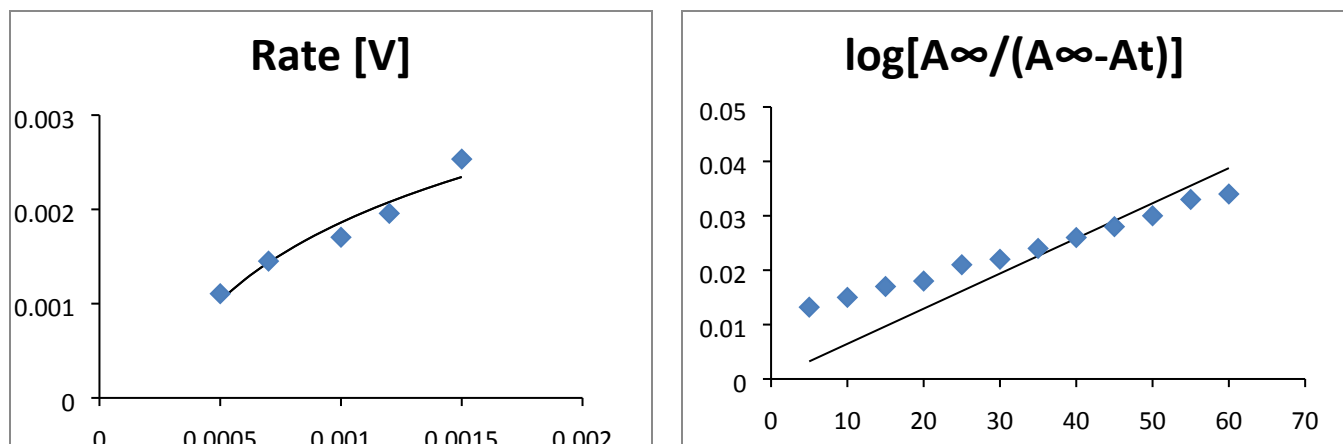

**Fig. S26** Plot of Enzymatic Kinetics for Complex 4.

**Table.S27** kinetic data of Time vs  $\log A_{\infty}/(A_{\infty}-A_t)$  of complex 1 at PNPP Concentration 0.001.

| Time(t) | Abs at 430 nm( $A_t$ ) | Abs at infinity( $A_{\infty}$ ) | ( $A_{\infty}-A_t$ ) | $A_{\infty}/(A_{\infty}-A_t)$ | $\log A_{\infty}/(A_{\infty}-A_t)$ |
|---------|------------------------|---------------------------------|----------------------|-------------------------------|------------------------------------|
| 5       | 0.089                  | 3.478                           | 3.389                | 1.02626                       | 0.1125                             |
| 10      | 0.136                  |                                 | 3.342                | 1.040694                      | 0.0173                             |
| 15      | 0.208                  |                                 | 3.27                 | 1.063608                      | 0.0267                             |
| 20      | 0.277                  |                                 | 3.201                | 1.086535                      | 0.036029                           |
| 25      | 0.341                  |                                 | 3.137                | 1.108702                      | 0.04481                            |
| 30      | 0.401                  |                                 | 3.077                | 1.13032                       | 0.0532                             |
| 35      | 0.462                  |                                 | 3.016                | 1.15318                       | 0.06189                            |
| 40      | 0.52                   |                                 | 2.958                | 1.17579                       | 0.07032                            |
| 45      | 0.574                  |                                 | 2.904                | 1.197658                      | 0.07833                            |
| 50      | 0.624                  |                                 | 2.854                | 1.2186405                     | 0.08586                            |
| 55      | 0.671                  |                                 | 2.807                | 1.239045                      | 0.093087                           |
| 60      | 0.718                  |                                 | 2.76                 | 1.2601449                     | 0.1004204                          |
|         |                        |                                 |                      |                               |                                    |

**Table.S28** kinetic data of Time vs  $\log A_{\infty}/(A_{\infty}-A_t)$  of complex 2 at PNPP Concentration 0.001.

| Time(t) | Abs at 430nm( $A_t$ ) | Abs at infinity( $A_{\infty}$ ) | ( $A_{\infty}-A_t$ ) | $A_{\infty}/(A_{\infty}-A_t)$ | Log $A_{\infty}/(A_{\infty}-A_t)$ |
|---------|-----------------------|---------------------------------|----------------------|-------------------------------|-----------------------------------|
| 5       | 0.928                 | 3.522                           | 2.594                | 1.35774                       | 0.1328166                         |
| 10      | 1.762                 |                                 | 1.762                | 1.9988649                     | 0.30078                           |
| 15      | 2.092                 |                                 | 1.43                 | 2.462937                      | 0.3914                            |
| 20      | 2.235                 |                                 | 1.287                | 2.73659                       | 0.4372097                         |
| 25      | 2.315                 |                                 | 1.207                | 2.91797                       | 0.46508                           |
| 30      | 2.361                 |                                 | 1.161                | 3.03359                       | 0.481956                          |
| 35      | 2.346                 |                                 | 1.176                | 2.994897                      | 0.476381                          |
| 40      | 2.349                 |                                 | 1.173                | 3.002557                      | 0.47749126                        |
| 45      | 2.357                 |                                 | 1.165                | 3.023175                      | 0.48046                           |
| 50      | 2.415                 |                                 | 1.107                | 3.1815                        | 0.502631                          |
| 55      | 2.452                 |                                 | 1.07                 | 3.2915                        | 0.5173938                         |
| 60      | 2.525                 |                                 | 0.997                | 3.5325                        | 0.548082                          |

**Table.S29** kinetic data of Time vs  $\log A_{\infty}/(A_{\infty}-A_t)$  of complex 3 at PNPP Concentration 0.001.

| Time(min) | Abs at 430nm( $A_t$ ) | Abs at infinity ( $A_{\infty}$ ) | ( $A_{\infty}-A_t$ ) | $A_{\infty}/(A_{\infty}-A_t)$ | log $A_{\infty}/(A_{\infty}-A_t)$ |
|-----------|-----------------------|----------------------------------|----------------------|-------------------------------|-----------------------------------|
| 5         | 0.345                 | 3.533                            | 3.188                | 1.108218319                   | 0.045                             |
| 10        | 0.482                 |                                  | 3.051                | 1.15798099                    | 0.063                             |
| 15        | 0.72                  |                                  | 2.813                | 1.255954497                   | 0.098                             |
| 20        | 0.962                 |                                  | 2.571                | 1.374173473                   | 0.137                             |
| 25        | 1.225                 |                                  | 2.308                | 1.530762565                   | 0.184                             |
| 30        | 1.482                 |                                  | 2.051                | 1.722574354                   | 0.236                             |
| 35        | 1.744                 |                                  | 1.789                | 1.974846283                   | 0.295                             |
| 40        | 1.988                 |                                  | 1.545                | 2.286731392                   | 0.36                              |
| 45        | 2.226                 |                                  | 1.307                | 2.703136955                   | 0.432                             |
| 50        | 2.443                 |                                  | 1.09                 | 3.241284404                   | 0.5105                            |
| 55        | 2.642                 |                                  | 0.891                | 3.965207632                   | 0.598                             |
| 60        | 2.82                  |                                  | 0.713                | 4.955119215                   | 0.695                             |

**Table.S30** kinetic data of Time vs  $\log A_{\infty}/(A_{\infty}-A_t)$  of complex 4 at PNPP Concentration 0.001.

| Time(Min) | Abs at 430nm(At) | Abs at infinity(A $\infty$ ) | (A $\infty$ -At) | A $\infty$ /(A $\infty$ -At) | log A $\infty$ /(A $\infty$ -At) |
|-----------|------------------|------------------------------|------------------|------------------------------|----------------------------------|
| 5         | 0.044            | 1.426                        | 1.382            | 1.03183792                   | 0.0132                           |
| 10        | 0.049            |                              | 1.377            | 1.0355846                    | 0.015                            |
| 15        | 0.055            |                              | 1.371            | 1.0401167                    | 0.017                            |
| 20        | 0.06             |                              | 1.366            | 1.04392387                   | 0.018                            |
| 25        | 0.066            |                              | 1.36             | 1.04852941                   | 0.021                            |
| 30        | 0.071            |                              | 1.355            | 1.05239852                   | 0.022                            |
| 35        | 0.077            |                              | 1.349            | 1.05707932                   | 0.024                            |
| 40        | 0.083            |                              | 1.343            | 1.06180194                   | 0.026                            |
| 45        | 0.089            |                              | 1.337            | 1.06656694                   | 0.028                            |
| 50        | 0.095            |                              | 1.331            | 1.07137491                   | 0.03                             |
| 55        | 0.101            |                              | 1.325            | 1.07622642                   | 0.033                            |
| 60        | 0.107            |                              | 1.319            | 1.08112206                   | 0.034                            |
|           |                  |                              |                  |                              |                                  |

**Table S31. Analysis of  $\pi$ -stacking interactions in Compounds 1 and 3**

| Cg(1)      | Cg(2)  | Symmetry Cg(2) | Cg-Cg      | $\alpha$ | $\beta$ | $\gamma$ | Slippage |
|------------|--------|----------------|------------|----------|---------|----------|----------|
| compound 1 |        |                |            |          |         |          |          |
| Py(N4)     | Py(N4) | [2-x,2-y,2-z]  | 3.7705(18) | 0        | 21.4    | 21.4     | 1.377    |
| compound 3 |        |                |            |          |         |          |          |
| Py(N1)     | Py(N1) | [2-x,1-y,1-z]  | 3.824(10)  | 0        | 26.9    | 26.9     | 1.733    |
| Py(N4)     | Py(N4) | [2-x,2-y,1-z]  | 3.629(11)  | 0        | 21.4    | 21.4     | 1.324    |

Cg-Cg = Distance between ring centroids (Å);  $\alpha$  = dihedral angle between planes 1 and 2 (°);  $\beta$  = angle Cg(1)-Cg(2) or Cg(1)-Me vector and normal to plane 1 (°);  $\gamma$  = Angle Cg(1)-Cg(2) vector and normal to plane 2 (°); Slippage = Distance between Cg(1) and Perpendicular Projection of Cg(2) on Ring 1 (Å).
